# Supplementary material
Source: HighWire-hosted journal article supplement (https://adc.bmj.com/content/archdischild-2021-323496)
Supplement: inline-supplementary-material-3 [file inline-supplementary-material-3.pdf]

Supplementary figure1. Funnel plots

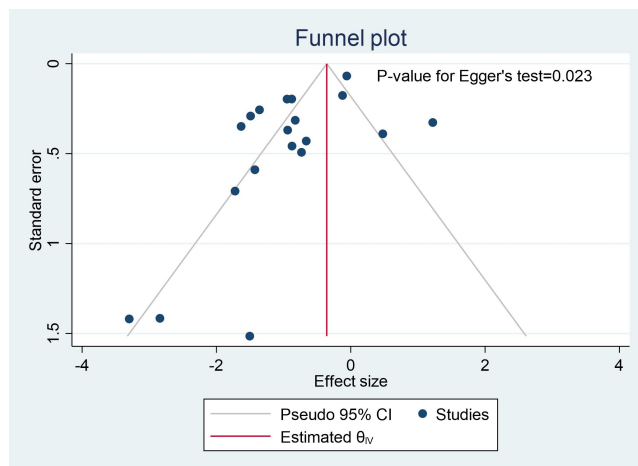

Supplementary figure 1a. Funnel plot of publication bias(Outcome: hospitalization)

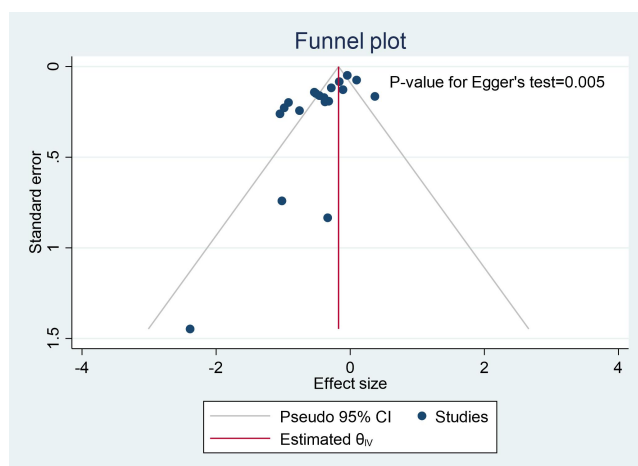

Supplementary figure 1b. Funnel plot of publication bias(Outcome: ED visits)

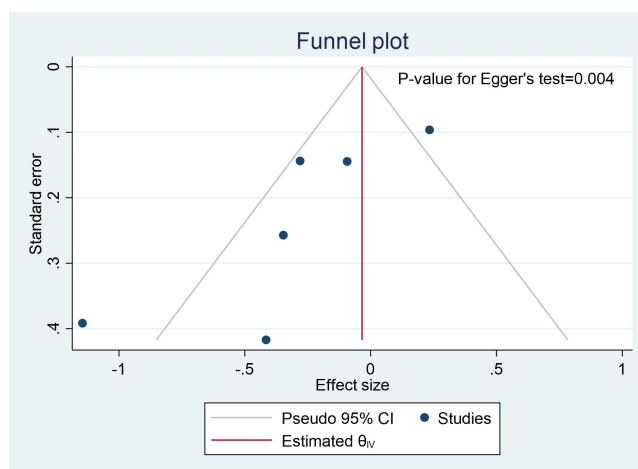

Supplementary figure 1c. Funnel plot of publication bias(Outcome: clinic visits)
